# Supplementary material for: Impact of non-ideality on reconstructing spatial and temporal variations of aerosol acidity with multiphase buffer theory
Source: Copernicus journal article supplement (doi:10.5194/acp-2021-55), 2021-04-12
Supplement: Supplementary file [file acp-2021-55-AC2-supplement.pdf]

**Title:** Impact of non-ideality on reconstructing spatial and temporal variations of aerosol acidity with multiphase buffer theory

- 5 We thank the referees for their valuable and constructive comments/suggestions on our manuscript. We have revised the manuscript accordingly and please find our point-to-point responses below.

**Comments by Referee Yunhong Zhang:**

**General Comments:**

- 10 *This paper is significant work to understand the total contribution of NH<sub>3</sub> on the acid-base equilibrium of condensed phase of atmospheric particles. Especially for the case of concentrated aqueous phase at low RH, non-ideality correction factors are explored. This paper should be published with considering the two comments.*

**Detailed Comments:**

- 15 *(1) when it gives the definition of pK<sub>a,NH<sub>3</sub>\*i</sub>*, physical significant of pK<sub>a,NH<sub>3</sub>\*i should be more clear if the authors provide more description, i.e., both condensed chemical compositions and NH<sub>3</sub> content in gas phase determined the pH when chemical reactions in the particles change the pH of condensed phase, or other more better description easy understanding for readers.</sub>

**Responses:**

- 20 Following the referee's suggestions, we've further clarified the meaning of  $K_{a,NH_3}^{*,i}$  as (see Line 87-93 in the revised manuscript):

“For typical ambient conditions when AWC varies between 1 to 1000  $\mu\text{g m}^{-3}$ , the  $[\text{NH}_3(\text{g})]$  is usually  $10^5$  to  $10^8$  times larger than  $[\text{NH}_3(\text{aq})]$ , and the above equation can be simplified into:

$$K_{a,NH_3}^{*,i} = \frac{[\text{H}^+(\text{aq})][\text{NH}_3(\text{g})]}{[\text{NH}_4^+(\text{aq})]} = K_{a,NH_3} \frac{\rho_w}{H_{NH_3} R T AWC} \quad (1a)$$

- 25 And taking negative lognormal on both sides, we have pH is related to  $\text{p}K_{a,NH_3}^{*,i}$  (i.e.,  $-\log K_{a,NH_3}^{*,i}$ ) as (Zheng et al., 2020):

$$\text{pH} = \text{p}K_{\text{a,NH}_3}^{*,i} + \log \frac{[\text{NH}_3(\text{g})]}{[\text{NH}_4^+(\text{aq})]}$$

The multiphase buffer capacity of  $\text{NH}_3/\text{NH}_4^+$  pair reached its local maximum when  $\text{pH} = \text{p}K_{\text{a,NH}_3}^{*,i}$ , namely when  $[\text{NH}_3(\text{g})] = [\text{NH}_4^+(\text{aq})]$ . At given AWC and  $T$ ,  $K_{\text{a,NH}_3}^{*,i}$  is constant.”

- 5 (2). line 80 in the equation,  $[\text{NH}_3(\text{g})]$  is equivalent molarity of gaseous  $\text{NH}_3$  in solution, its unit is molar.Kg-1. In this case  $K_{\text{a,NH}_3}^{*,i} = K_{\text{a,NH}_3} (1 + 1/(H_{\text{NH}_3} R T AWC))$ , water density should not appear in the equation. The same is in 8a and 8b.

### Responses:

Many thanks. We double checked the related part and our original equations are correct. The confusion  
10 may be potentially caused by the definition of AWC. In this study, AWC is represented in the unit of ( $\mu\text{g}$  water) / ( $\text{m}^3$  air), instead of the water volume mixing ratio,  $w_v$ , of (L water)/(L air). With the current units applied, the term  $H_{\text{NH}_3} R T$  has the unit of unity, and  $\rho_w$  is needed to convert the AWC to  $w_v$ .

To avoid such confusions, we’ve further clarified the units in the relevant equations as (see Line 80-86 in the revised manuscript):

- 15 “The multiphase effective acid dissociation constant of  $\text{NH}_3$  under ideal conditions,  $K_{\text{a,NH}_3}^{*,i}$ , depends only on AWC and temperature as (Zheng et al., 2020):

$$K_{\text{a,NH}_3}^{*,i} = \frac{[\text{H}^+(\text{aq})]([\text{NH}_3(\text{aq})] + [\text{NH}_3(\text{g})])}{[\text{NH}_4^+(\text{aq})]} = K_{\text{a,NH}_3} \left( 1 + \frac{\rho_w}{H_{\text{NH}_3} R T AWC} \right)$$

where AWC is in  $\mu\text{g m}^{-3}$ , and is mainly determined by air particulate matter concentrations and RH. The  $\rho_w$   
20 is water density in  $\mu\text{g m}^{-3}$ , and  $\text{AWC}/\rho_w$  represents the aerosol water volume mixing ratio in the air in ( $\text{m}^3$  water) / ( $\text{m}^3$  air).  $[\text{NH}_3(\text{g})]$  represents equivalent molality (in  $\text{mol kg}^{-1}$ ) of gaseous  $\text{NH}_3$  in solution (see details in Zheng et al. (2020)). The  $H_{\text{NH}_3}$  is Henry’s law constant of  $\text{NH}_3$  in  $\text{mol L}^{-1} \text{atm}^{-1}$ ,  $R$  is the gas constant of  $0.08205 \text{ atm L mol}^{-1} \text{K}^{-1}$ , and  $T$  is temperature in K.”
